# Supplementary material for: Microbiomes and metabolomes of dominant coral reef primary producers illustrate a potential role for immunolipids in marine symbioses
Source: PubMed Central journal article supplement (PMC10471604; doi:10.1038/s42003-023-05230-1), 2023-08-31
Supplement: 42003_2023_5230_MOESM2_ESM.pdf [file 42003_2023_5230_MOESM2_ESM.pdf]

## Description of Additional Supplementary Files

**File name:** Supplementary Data 1

**Description:** P PERMANOVA summary

**File name:** Supplementary Data 2

**Description:** Metabolites summary: statistical analysis, Qemistree classification and Mmvec ordination.

**File name:** Supplementary Data 3

**Description:** MASST results

**File name:** Supplementary Data 4

**Description:** Samples information

**File name:** Supplementary Data 5

**Description:** MASST job links in GNPS
